# Supplementary material for: Are Commonly Measured Functional Traits Involved in Tropical Tree Responses to Climate?
Source: Hindawi journal article supplement (doi:10.1155/2014/389409), 2014-01-01
Supplement: f1 [file 389409.f1.pdf]

758 **Appendix S1. Mean values of the functional traits for the studied**  
759 **species**

| Species                             | Nb | DBH <sub>max</sub><br>mm | Height <sub>max</sub><br>m | WdDens <sub>max</sub><br>g·cm <sup>-3</sup> | Bark<br>mm | SLA<br>cm <sup>2</sup> ·g <sup>-1</sup> | K<br>μg·g <sup>-1</sup> | N<br>cg·g <sup>-1</sup> | P<br>μg·g <sup>-1</sup> | CN<br>g·g <sup>-1</sup> | LTD<br>g·cm <sup>-3</sup> | Chlo<br>μg·mm <sup>-2</sup> | Tough<br>N | δ <sup>13</sup> C<br>‰ |
|-------------------------------------|----|--------------------------|----------------------------|---------------------------------------------|------------|-----------------------------------------|-------------------------|-------------------------|-------------------------|-------------------------|---------------------------|-----------------------------|------------|------------------------|
| <i>Apeiba glabra</i>                | 1  | 440                      | 33                         | 0.45                                        | -2.6       | 12                                      | 0.0066                  | 0.02                    | 0.00086                 | 24                      | 3.6e-05                   | 62                          | 1.1        | 0.22                   |
| <i>Aspidosperma album</i>           | 2  | 600                      | 43                         | 0.67                                        | 3.6        | 7.3                                     | 0.0049                  | 0.017                   | 0.00046                 | 28                      | 4.1e-05                   | 89                          | 2.2        | 0.77                   |
| <i>Bocopa prouacensis</i>           | 4  | 380                      | 37                         | 0.84                                        | -1.4       | 11                                      | 0.0026                  | 0.025                   | 0.00051                 | 20                      | 4.4e-05                   | 63                          | 2.4        | 0.35                   |
| <i>Carapa procera</i>               | 14 | 440                      | 35                         | 0.55                                        | -0.5       | 10                                      | 0.0043                  | 0.018                   | 0.00064                 | 27                      | 4.3e-05                   | 89                          | 2.6        | 0.76                   |
| <i>Catostemma fragrans</i>          | 1  | 290                      | 29                         | 0.61                                        | 1.8        | 11                                      | 0.0017                  | 0.023                   | 0.00022                 | 24                      | 3.9e-05                   | 68                          | 2.5        | 0.91                   |
| <i>Cecropia obtusa</i>              | 1  | 300                      | 33                         | 0.41                                        | -0.3       | 9.1                                     | 0.0086                  | 0.028                   | 0.0014                  | 18                      | 3.5e-05                   | 66                          | 1.8        | 1.8                    |
| <i>Chaetocarpus schomburgkianus</i> | 4  | 540                      | 33                         | 0.77                                        | -1.1       | 6                                       | 0.0018                  | 0.013                   | 0.00045                 | 34                      | 4.4e-05                   | 100                         | 2.7        | -1.1                   |
| <i>Chimarrhis turbinata</i>         | 1  | 850                      | 40                         | 0.61                                        | -4.7       | 13                                      | 0.012                   | 0.028                   | 0.0011                  | 17                      | 2.9e-05                   | 50                          | 1.4        | 0.89                   |
| <i>Chrysophyllum prieurii</i>       | 4  | 500                      | 33                         | 0.8                                         | -0.44      | 7.8                                     | 0.0048                  | 0.022                   | 0.00062                 | 23                      | 5.6e-05                   | 96                          | 2.1        | 1.2                    |
| <i>Chrysophyllum sanguinolentum</i> | 5  | 560                      | 36                         | 0.6                                         | 3          | 7.2                                     | 0.0033                  | 0.015                   | 0.00047                 | 33                      | 4.9e-05                   | 71                          | 2.6        | 0.95                   |
| <i>Couepia bracteosa</i>            | 1  | 430                      | 28                         | 0.8                                         | 0.86       | 8.9                                     | 0.0044                  | 0.015                   | 0.00048                 | 34                      | 4.7e-05                   | 59                          | 2.4        | -0.46                  |
| <i>Dicorynia guianensis</i>         | 10 | 800                      | 50                         | 0.65                                        | -1.2       | 12                                      | 0.0037                  | 0.024                   | 0.00044                 | 21                      | 3.7e-05                   | 77                          | 1.7        | 1.5                    |
| <i>Drypetes variabilis</i>          | 1  | 500                      | 34                         | 0.72                                        | 0.25       | 9.2                                     | 0.0047                  | 0.02                    | 0.00078                 | 22                      | 3.9e-05                   | 92                          | 2.2        | 1                      |
| <i>Eperua falcata</i>               | 25 | 680                      | 34                         | 0.64                                        | 0.86       | 13                                      | 0.0038                  | 0.021                   | 0.00077                 | 24                      | 5e-05                     | 60                          | 1.3        | 2                      |
| <i>Eschweilera coriacea</i>         | 13 | 570                      | 37                         | 0.68                                        | -0.57      | 9.9                                     | 0.0084                  | 0.021                   | 0.0012                  | 24                      | 4.9e-05                   | 77                          | 1.9        | -0.54                  |
| <i>Eschweilera sagotiana</i>        | 12 | 530                      | 44                         | 0.7                                         | 0.54       | 7.2                                     | 0.0028                  | 0.019                   | 0.00045                 | 28                      | 4.6e-05                   | 71                          | 3          | -0.6                   |
| <i>Goupia glabra</i>                | 3  | 830                      | 37                         | 0.67                                        | 1.5        | 13                                      | 0.0028                  | 0.021                   | 0.00063                 | 24                      | 4.9e-05                   | 72                          | 1.4        | 0.1                    |
| <i>Gustavia hexapetala</i>          | 1  | 220                      | 35                         | 0.62                                        | 1.8        | 13                                      | 0.005                   | 0.026                   | 4e-04                   | 18                      | 3.7e-05                   | 64                          | 1.5        | 0.14                   |
| <i>Hebepetalum humirifolium</i>     | 1  | 460                      | 24                         | 0.74                                        | -0.065     | 14                                      | 0.0092                  | 0.023                   | 0.00064                 | 21                      | 3.3e-05                   | 78                          | 1.1        | 0.32                   |
| <i>Hirtella bicornis</i>            | 1  | 400                      | 24                         | 0.74                                        | -0.84      | 15                                      | 0.0035                  | 0.018                   | 5e-04                   | 26                      | 4.3e-05                   | 58                          | 1.4        | 1.8                    |
| <i>Inga alba</i>                    | 1  | 750                      | 30                         | 0.51                                        | -3.8       | 15                                      | 0.0044                  | 0.035                   | 0.0012                  | 14                      | 4.3e-05                   | 80                          | 1.4        | 0.69                   |
| <i>Iryanthera sagotiana</i>         | 3  | 390                      | 36                         | 0.54                                        | 0.012      | 12                                      | 0.0024                  | 0.019                   | 0.00053                 | 27                      | 3.9e-05                   | 80                          | 0.85       | -1                     |
| <i>Laemellea aculeata</i>           | 1  | 190                      | 18                         | 0.54                                        | 1.6        | 12                                      | 0.0069                  | 0.016                   | 7e-04                   | 33                      | 3.2e-05                   | 87                          | 1.1        | -1                     |
| <i>Laetia procera</i>               | 1  | 510                      | 38                         | 0.59                                        | 4.9        | 10                                      | 0.0035                  | 0.025                   | 0.001                   | 21                      | 4.4e-05                   | 100                         | 1.8        | -0.26                  |
| <i>Lecythis corrugata</i>           | 1  | 410                      | 34                         | 0.59                                        | -1.2       | 8.1                                     | 0.0041                  | 0.019                   | 0.00046                 | 26                      | 4.8e-05                   | 64                          | 2          | -1.5                   |
| <i>Lecythis persistens</i>          | 4  | 280                      | 38                         | 0.69                                        | 0.36       | 8.7                                     | 0.0062                  | 0.019                   | 5e-04                   | 27                      | 4.2e-05                   | 78                          | 2.5        | -0.59                  |
| <i>Lecythis poiteaui</i>            | 1  | 520                      | 40                         | 0.68                                        | 1.8        | 13                                      | 0.0046                  | 0.028                   | 0.00059                 | 18                      | 4.7e-05                   | 54                          | 1.3        | 0.47                   |
| <i>Lecythis zabucajo</i>            | 1  | 520                      | 38                         | 0.68                                        | 1.7        | 12                                      | 0.0072                  | 0.023                   | 0.00065                 | 23                      | 4.4e-05                   | 56                          | 1          | 1.2                    |
| <i>Licania alba</i>                 | 4  | 440                      | 31                         | 0.77                                        | -0.47      | 7.6                                     | 0.0043                  | 0.014                   | 0.00039                 | 34                      | 4.2e-05                   | 60                          | 2.7        | -0.6                   |
| <i>Licania heteromorpha</i>         | 2  | 370                      | 32                         | 0.78                                        | -1         | 8.7                                     | 0.0022                  | 0.015                   | 4e-04                   | 34                      | 4.8e-05                   | 70                          | 1.9        | -1.6                   |
| <i>Licania membranacea</i>          | 9  | 500                      | 42                         | 0.8                                         | 0.049      | 8.2                                     | 0.0048                  | 0.016                   | 0.00039                 | 30                      | 4.8e-05                   | 63                          | 2          | -1.6                   |
| <i>Macoubea guianensis</i>          | 1  | 580                      | 39                         | 0.43                                        | 4.9        | 16                                      | 0.0046                  | 0.022                   | 0.00069                 | 25                      | 3.6e-05                   | 52                          | 0.89       | 2.3                    |
| <i>Micropholis guianensis</i>       | 1  | 650                      | 36                         | 0.64                                        | -0.06      | 9.1                                     | 0.0051                  | 0.021                   | 0.00049                 | 24                      | 4.4e-05                   | 64                          | 1.5        | -0.32                  |
| <i>Moronebea coccinea</i>           | 3  | 640                      | 36                         | 0.6                                         | 1.8        | 12                                      | 0.0044                  | 0.017                   | 0.00052                 | 29                      | 3.4e-05                   | 94                          | 0.88       | 0.29                   |
| <i>Oxandra asbeckii</i>             | 2  | 190                      | 24                         | 0.78                                        | 1.8        | 11                                      | 0.0034                  | 0.02                    | 0.00037                 | 24                      | 4.1e-05                   | 84                          | 1.8        | 0.53                   |
| <i>Parinari campestris</i>          | 1  | 750                      | 33                         | 0.7                                         | 1.1        | 6.8                                     | 0.0037                  | 0.016                   | 0.00053                 | 29                      | 4.5e-05                   | 48                          | 2.5        | -0.022                 |
| <i>Platonia insignis</i>            | 1  | 960                      | 30                         | 0.59                                        | 13         | 5.4                                     | 0.0041                  | 0.015                   | 0.00059                 | 31                      | 4.1e-05                   | 70                          | 2.6        | 1.8                    |
| <i>Pouteria engleri</i>             | 1  | 570                      | 22                         | 0.62                                        | 2          | 11                                      | 0.0075                  | 0.025                   | 0.00053                 | 19                      | 5e-05                     | 75                          | 1.3        | 0.49                   |
| <i>Pouteria eugenifolia</i>         | 1  | 670                      | 43                         | 0.74                                        | -1.6       | 8.2                                     | 0.0031                  | 0.015                   | 0.00044                 | 33                      | 5.1e-05                   | 70                          | 1.5        | -0.29                  |
| <i>Pouteria guianensis</i>          | 1  | 570                      | 34                         | 0.79                                        | -2.1       | 7.5                                     | 0.003                   | 0.017                   | 0.00046                 | 30                      | 5e-05                     | 79                          | 2          | -0.99                  |
| <i>Protium giganteum</i>            | 1  | 400                      | 27                         | 0.44                                        | 0.58       | 13                                      | 0.011                   | 0.02                    | 0.00085                 | 23                      | 3.6e-05                   | 87                          | 2.6        | -1.7                   |
| <i>Recordoxylon speciosum</i>       | 9  | 550                      | 35                         | 0.68                                        | -0.46      | 15                                      | 0.0043                  | 0.023                   | 0.00082                 | 22                      | 3.8e-05                   | 60                          | 1.3        | 0.61                   |
| <i>Sextonia rubra</i>               | 2  | 800                      | 50                         | 0.47                                        | 3.2        | 9.4                                     | 0.0045                  | 0.018                   | 0.00063                 | 29                      | 4.3e-05                   | 84                          | 1.6        | 0.41                   |
| <i>Simaba moretii</i>               | 1  | 810                      | 36                         | 0.38                                        | 3          | 7.6                                     | 0.0061                  | 0.019                   | 0.00072                 | 25                      | 4.7e-05                   | 71                          | 1.7        | -0.33                  |
| <i>Sterculia pruriens</i>           | 7  | 690                      | 40                         | 0.46                                        | 1          | 12                                      | 0.021                   | 0.02                    | 0.0019                  | 25                      | 3.8e-05                   | 59                          | 1.9        | 0.18                   |
| <i>Swartzia polyphylla</i>          | 1  | 980                      | 38                         | 0.68                                        | -3.9       | 12                                      | 0.0022                  | 0.023                   | 0.00066                 | 22                      | 4.1e-05                   | 72                          | 1.3        | -0.38                  |
| <i>Symphonia globulifera</i>        | 6  | 920                      | 26                         | 0.56                                        | 0.037      | 10                                      | 0.0065                  | 0.02                    | 0.00063                 | 24                      | 3.1e-05                   | 91                          | 1.3        | 1.1                    |
| <i>Tapirira guianensis</i>          | 1  | 420                      | 30                         | 0.56                                        | -0.76      | 12                                      | 0.0096                  | 0.019                   | 0.0011                  | 25                      | 4.5e-05                   | 88                          | 1.2        | 0.21                   |
| <i>Tapirira obtusa</i>              | 1  | 350                      | 25                         | 0.44                                        | -0.22      | 11                                      | 0.0035                  | 0.019                   | 5e-04                   | 26                      | 4.5e-05                   | 69                          | 1.1        | -0.98                  |
| <i>Tapura capitulifera</i>          | 2  | 620                      | 33                         | 0.76                                        | -0.58      | 6                                       | 0.0065                  | 0.013                   | 0.00029                 | 31                      | 4.2e-05                   | 94                          | 3.4        | 0.79                   |
| <i>Tetragastris panamensis</i>      | 3  | 530                      | 32                         | 0.68                                        | 0.17       | 9                                       | 0.0047                  | 0.016                   | 0.00049                 | 29                      | 5.5e-05                   | 74                          | 2          | -0.12                  |
| <i>Virola michelii</i>              | 8  | 520                      | 38                         | 0.47                                        | 0.93       | 11                                      | 0.0035                  | 0.024                   | 0.00063                 | 22                      | 4.8e-05                   | 85                          | 0.91       | -1.7                   |
| <i>Vouacapoua americana</i>         | 17 | 730                      | 42                         | 0.69                                        | -1.1       | 14                                      | 0.0073                  | 0.026                   | 0.0016                  | 20                      | 4.7e-05                   | 56                          | 1.5        | -0.46                  |

Table S1.1: Mean values of the 13 functional traits from 53 neotropical species used to study community response to seasonal climate variations; DBH<sub>max</sub> = Maximum diameter; Height<sub>max</sub> = Maximum height; WdDens = Trunk xylem density; Bark = Trunk bark thickness, corrected for girth (Baraloto et al., 2010); SLA = Specific leaf area; K = Foliar K<sub>m</sub>; N = Foliar N<sub>m</sub>; P = Foliar P<sub>m</sub>; CN = Foliar C:N; LTD = Leaf tissue density; Chlo = Laminar total chlorophyll; Tough = Laminar toughness; δ<sup>13</sup>C = Foliar δ<sup>13</sup>C composition, corrected for height (Baraloto et al., 2010).

760  
761

## Appendix S2. Climate data values and descriptive statistics during the study period

|                      | mean    | SD     | unit                                |
|----------------------|---------|--------|-------------------------------------|
| Global.irradiance    | 590.34  | 170.17 | MJ.m <sup>-2</sup> .d <sup>-1</sup> |
| T.min                | 23.43   | 0.82   | celsius degree                      |
| T.max                | 28.37   | 1.35   | celsius degree                      |
| REW <sup>a</sup>     | 0.77    | 0.28   | -                                   |
| SWD <sup>b</sup>     | 0.23    | 0.28   | -                                   |
| VPD <sup>c</sup>     | 6.05    | 1.68   | kPa                                 |
| Rain                 | 9.03    | 17.21  | mm.d <sup>-1</sup>                  |
| Atmospheric.pressure | 100.657 | 0.154  | kPa                                 |
| Relative.Humidity    | 82.58   | 4.34   | %                                   |
| Wind.speed           | 2.80    | 0.70   | kn                                  |

<sup>a</sup>:Relative Extractable Water ,<sup>b</sup>: Soil Water Deficit (SWD=1-REW),<sup>c</sup>:Vapour Pressure Deficit

Table S2.1: descriptive statistics of the climatic variables

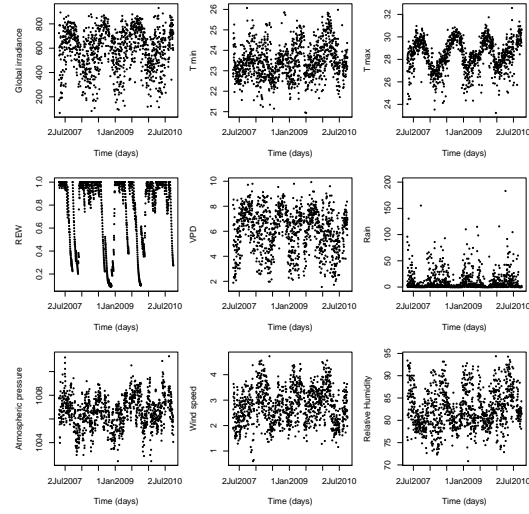

Figure S2.1: Variation of the climatic variables during the study period

## Appendix S3. Correlation between climate data

|                    | irradiance | T min | T max | REW <sup>a</sup> | VPD <sup>b</sup> | Rain  | P Atm <sup>c</sup> | H R <sup>d</sup> | Wind speed | SWD <sup>e</sup> |
|--------------------|------------|-------|-------|------------------|------------------|-------|--------------------|------------------|------------|------------------|
| irradiance         | 1.00       | 0.03  | 0.76  | -0.40            | 0.70             | -0.52 | 0.11               | -0.63            | 0.18       | 0.40             |
| T min              | 0.03       | 1.00  | 0.06  | -0.09            | 0.34             | -0.26 | -0.14              | -0.34            | 0.45       | 0.09             |
| T max              | 0.76       | 0.06  | 1.00  | -0.60            | 0.62             | -0.49 | 0.04               | -0.50            | -0.03      | 0.60             |
| REW <sup>a</sup>   | -0.40      | -0.09 | -0.60 | 1.00             | -0.53            | 0.35  | 0.12               | 0.45             | -0.08      | -1.00            |
| VPD <sup>b</sup>   | 0.70       | 0.34  | 0.62  | -0.53            | 1.00             | -0.64 | 0.02               | -0.98            | 0.49       | 0.53             |
| Rain               | -0.52      | -0.26 | -0.49 | 0.35             | -0.64            | 1.00  | -0.01              | 0.63             | -0.26      | -0.35            |
| P Atm <sup>c</sup> | 0.11       | -0.14 | 0.04  | 0.12             | 0.02             | -0.01 | 1.00               | -0.02            | -0.07      | -0.12            |
| H R <sup>d</sup>   | -0.63      | -0.34 | -0.50 | 0.45             | -0.98            | 0.63  | -0.02              | 1.00             | -0.53      | -0.45            |
| Wind speed         | 0.18       | 0.45  | -0.03 | -0.08            | 0.49             | -0.26 | -0.07              | -0.53            | 1.00       | 0.08             |
| SWD <sup>e</sup>   | 0.40       | 0.09  | 0.60  | -1.00            | 0.53             | -0.35 | -0.12              | -0.45            | 0.08       | 1.00             |

<sup>a</sup>:Relative Extractable Water, <sup>b</sup>: Vapour Pressure Deficit, <sup>c</sup>: Atmospheric pressure, <sup>d</sup>:Relative Humidity, <sup>e</sup>: Soil Water Deficit (SWD=1-REW)

Table S3.1: Correlation coefficient of the climatic variables
